# Supplementary material
Source: PubMed Central journal article supplement (PMC3964829)
Supplement: cb400618m_si_001.pdf [file cb400618m_si_001.pdf]

# **Defining binding Efficiency and Specificity of auxins for SCF<sup>TIR1/AFB</sup>-Aux/IAA co-receptor complex formation**

Authors:

Sarah Lee<sup>1</sup>, Shanthi Sundaram<sup>1,2</sup>, Lynne Armitage<sup>3</sup>, John P. Evans<sup>4</sup>, Tim Hawkes<sup>4</sup>,  
Stefan Kepinski<sup>3</sup>, Noel Ferro<sup>5</sup> and Richard M. Napier<sup>1\*</sup>

<sup>1</sup> School of Life Sciences, University of Warwick, Wellesbourne, Warwickshire,  
CV35 9EF, UK.

<sup>2</sup> Centre for Biotechnology, Nehru Science Complex, University of Allahabad,  
Allahabad- 211002, UP, India.

<sup>3</sup> Centre for Plant Sciences, University of Leeds, Leeds, LS2 9JT, UK.

<sup>4</sup> Syngenta, Ltd Jealott's Hill Intl Research Centre, Bracknell, Berkshire, RG42  
6EY, UK

<sup>5</sup> Mulliken Center for Theoretical Chemistry, Institute for Physical and  
Theoretical Chemistry, Wegelerstr. 12, D-53115 Bonn, Germany.

**\* Corresponding author:**

**Prof Richard Napier**

Tel: **++44 (0)24 765 75094**

Fax: **++44 (0)24 765 74500**

e-mail – [richard.napier@warwick.ac.uk](mailto:richard.napier@warwick.ac.uk)

## Supplementary Data

Figure S1.

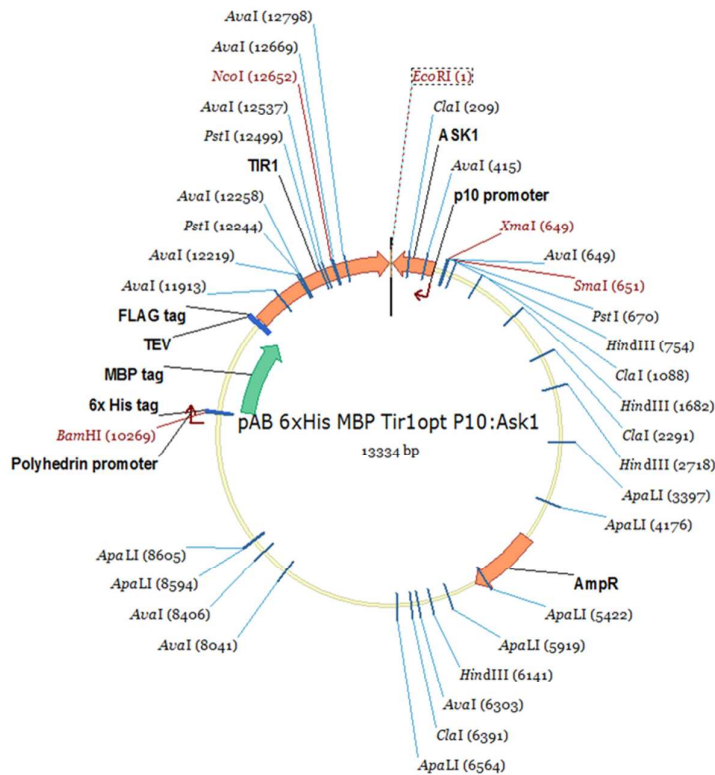

Figure S1a: Construct for baculovirus co-expression<sup>5</sup> of ASK1 and TIR1 (as His-MBP-TEV-FLAG-TIR1). The sequence of the TIR1 fusion protein is:

MSG**HHHHHH**GDQLVEEMAEGLVWINGDKGYNGLAEVGGKFEKDTGIKVTVEHPDKLEEKFPQVAATGDGPDIIFFWAHDRFGGYAQSGLLAEITPDKAFQDKLYPFTWDAVRYNGKLIAYPIAVEALS LIYKDLLPNPKTWEEIPALDKELKAKGKSALMFNLQEPYFTWPLIAADGGYAFKYENGYDIKDVGVNAGAKAGLTFVLVDLIKMKHMNADTDYSIAEAAFNKGETAMTINGPWAWNSIDTSKVN YGVTVLPTFKGQPSKPFVGVLSAGINAASPNKELAKEFLENYLLTDEGLEAVNKDKPLGAVALKSY EEELAKDPRIAATMENAQKGEIMPNIQMSAFWYAVRTAVINAASGRQTVDEALKDAQTNSSNN NNNNNNNNLGIEGRGENLYFQAAIADYKDDDDKGLNMQKRIALSFPPEVLEHVFSFIQLDK DRNSVSLVCKSWYEIERWCRRKVFIGNCYAVSPATVIRRFKPKVRSVELKGGKPHFADFNLPDGG WGGYVYPWIEAMSSSYTWLEEIRLKRMMVVTDDCLELIAKSFKNFKVLVLSCEGFSTDGLAAIA ATCRNLKELDLRESVDDVSGHWLSHFPTYTSLVSLNISCLASEVSFSALERLVTRCPNLKSL KLNRAVPLEKLATLLQRAPQLEELGTGGYTAEVRPDVYSGLSVALSGCKELRCLSGFWDVAPAYLP AVYSVCSRLTTLNLSYATVQSYDLVKKLCQCPKLQRLWVLDYIEDAGLEVLAACKDLREL RVFPSEPFVMEPNVALTEQGLVSVSMGCPKLESVLYFCRQMTNAALITIARNRPNMTRFRLCII EPKAPDYLTLEPLDIGFGAIVEHCKDLRRLSLSGLLTDKVFYIGTYAKKMEMLSVAFAGSDLG MHHVLSGCDSLRKLEIRDCPFGDKALLANASKLETMRSLWMSSCSVSFGACKLLGQKMPKLN VEVIDERGAPDSRPESCPVERVFIYRTVAGPRFDMPGFVWNMDQDSTMFRSRQIITNGL

The short epitope tags are shown in **BOLD**, The TEV protease site is in **BOLD** (no underscore), MBP is in *ITALICS* and the first residue of TIR1 is underscored for ease of reference.

Figure S2.

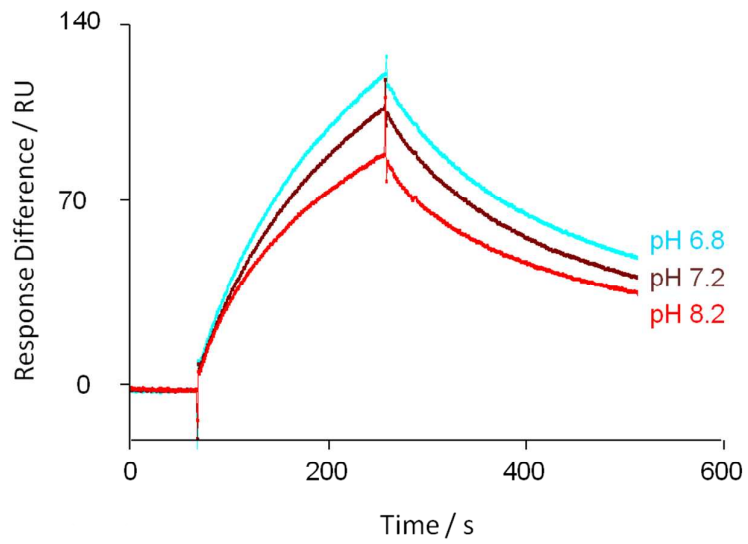

Figure S2. The assembly of the TIR1 co-receptor complex shows marginal dependence on pH between pH 6.8 – pH 8.2.

Table S1

Summary of compounds, binding data, bioactivity scores and previous classifications. Compounds are arranged by family as in Figure 4. Binding is given initially as the magnitude of the association normalised to the binding measured for IAA. This is converted to a score for comparison to the scores assigned in other classification schemes: up to 10% = 0; 10-30% = 1; 30-60% = 2; over 60% = 3. Boxes are colour-coded for ease of comparison, with the most highly active (3) red, 2 orange and 1 yellow. \* see Walsh et al, 2006.

|    | Compound                                                            | CAS number | TIR1             | AFB5             | TIR1 binding score | AFB5 binding score | Ferro et al     | Katekar         | Ferro class        | Tomic class        |
|----|---------------------------------------------------------------------|------------|------------------|------------------|--------------------|--------------------|-----------------|-----------------|--------------------|--------------------|
|    |                                                                     |            | Binding as % IAA | Binding as % IAA |                    |                    | bioactive score | bioactive score | molecular dynamics | molecular dynamics |
| 1  | indole-3-acetic acid                                                | 87-51-4    | 100              | 100              | 3                  | 3                  | 3               | 3               | 4                  | 1                  |
| 2  | 1-naphthylacetic acid                                               | 86-87-3    | 76               | 59               | 3                  | 3                  | 3               | 3               | 3                  | 1                  |
| 3  | 2-naphthylacetic acid                                               | 581-96-4   | 25               | 0                | 1                  | 0                  | 1               | 1               | 7                  | 2                  |
| 4  | 2-naphthoxyacetic acid                                              | 120-23-0   | 0                | 12               | 0                  | 1                  | 2               | 2               | 11                 |                    |
| 5  | indole-3-butyric acid                                               | 133-32-4   | 15               | 5                | 1                  | 0                  | 3               |                 | 5                  | 4                  |
| 6  | 2,4-dichlorophenoxypropanoic acid (Dichloroprop, Chirality unknown) | 120-36-5   | 56               | 30               | 2                  | 2                  |                 |                 |                    | 1                  |
| 7  | 2,4,5-trichlorophenoxypropionic acid (Chirality unknown)            | 93-72-1    | 70               | 35               | 3                  | 2                  |                 |                 |                    |                    |
| 8  | p-hydroxycinnamic acid ((E)-3-phenylprop-2-enoic acid)              |            | 0                | 2                | 0                  | 0                  |                 |                 |                    |                    |
| 9  | tryptophan                                                          | 73-22-3    | 0                | 0                | 0                  | 0                  | 0               |                 |                    |                    |
| 10 | tryptophol                                                          | 526-55-6   | 7                | 2                | 0                  | 0                  |                 |                 |                    |                    |
| 11 | tryptamine                                                          | 61-54-1    | 7                | 6                | 0                  | 0                  |                 |                 |                    |                    |
| 12 | indole-3-lactic acid                                                | 832-97-3   | 0                | 0                | 0                  | 0                  | 1               |                 | 1                  |                    |
| 13 | indole-3-propionic acid                                             | 830-96-6   | 54               | 27               | 2                  | 1                  | 1               |                 | 3                  | 2                  |
| 14 | indole-3-glycolic acid                                              |            | 0                | 0                | 0                  | 0                  | 1               |                 | 2                  |                    |
| 15 | indole-3-pyruvic acid                                               | 392-12-1   | 54               | 27               | 2                  | 1                  | 0               |                 | 1                  |                    |
| 16 | indole-3-carbinol                                                   | 700-06-1   | 0                | 0                | 0                  | 0                  |                 |                 |                    |                    |
| 17 | indoxylacetic acid                                                  |            | 0                | 0                | 0                  | 0                  |                 |                 |                    |                    |
| 18 | indole-3-carboxylic acid                                            | 771-50-6   | 0                | 0                | 0                  | 0                  | 2               |                 | 10                 |                    |
| 19 | indole-3-acetaldehyde                                               | 2591-98-2  | 0                | 0                | 0                  | 0                  |                 |                 |                    |                    |
| 20 | benzolin                                                            | 3813-05-6  | 0                | 0                | 0                  | 0                  |                 |                 |                    |                    |
| 21 | benzoic acid                                                        | 65-85-0    | 8                | 0                | 0                  | 0                  | 0               | 0               | 1                  | 3                  |
| 22 | 4-hydroxybenzoic acid                                               | 99-96-7    | 3                | 0                | 0                  | 0                  |                 |                 |                    |                    |

|    |                                            |            |    |     |   |   |   |   |    |      |
|----|--------------------------------------------|------------|----|-----|---|---|---|---|----|------|
| 23 | 2,4-dichlorobenzoic acid                   | 50-84-0    | 6  | 0   | 0 | 0 | 0 | 0 | 4  |      |
| 24 | 2,5-dichlorobenzoic acid                   | 50-79-3    | 2  | 0   | 0 | 0 | 1 | 1 | 5  |      |
| 25 | 2,5-dihydroxybenzoic acid                  | 490-79-9   | 1  | 0   | 0 | 0 |   |   |    |      |
| 26 | 2-chloro-5-bromomethoxybenzoic acid        |            | 7  | 0   | 0 | 0 |   |   |    |      |
| 27 | amiben (3-amino-2,5-dichlorobenzoic acid)  | 133-90-4   | 0  | 0   | 0 | 0 | 1 | 2 | 7  |      |
| 28 | 2-amino-3,5-diiodobenzoic acid             | 609-86-9   | 3  | 0   | 0 | 0 |   |   |    |      |
| 29 | 3,5-diiodo-2-hydroxybenzoic acid           | 133-91-5   | 0  |     | 0 | 0 |   |   |    |      |
| 30 | 3,5-diiodo-2-hydroxybenzoic acid           | 133-91-5   | 0  | 8   | 0 | 0 |   |   |    |      |
| 31 | 2,3,6-trichlorobenzoic acid                | 50-31-7    | 17 | 9   | 1 | 0 | 3 |   | 9  |      |
| 32 | Gallic acid (3,4,5-trihydroxybenzoic acid) | 149-91-7   | 2  | 0   | 0 | 0 |   |   |    |      |
| 33 | 2,3,5-triiodobenzoic acid                  | 88-82-4    | 0  | 2   | 0 | 0 |   | 3 |    | 4    |
| 34 | phenyl acetic acid                         | 103-82-2   | 55 | 5   | 2 | 0 | 1 | 1 | 7  |      |
| 35 | 4-hydroxyphenylacetic acid                 | 156-38-7   | 38 | 3   | 2 | 0 |   |   |    |      |
| 36 | 4-hydroxyphenylacetic acid                 | 156-38-7   | 35 | 1   | 2 | 0 |   |   |    |      |
| 37 | 4-chlorophenylacetic acid                  | 1878-66-6  | 5  | 8   | 0 | 0 |   |   |    |      |
| 38 | phenoxy acetic acid                        | 122-59-8   | 15 | 2   | 1 | 0 | 0 | 0 | 11 | 3    |
| 39 | 2-formylphenoxyacetic acid                 | 6280-80-4  | 6  | 6   | 0 | 0 |   |   |    |      |
| 40 | 4-chlorophenoxyacetic acid                 | 122-88-3   | 35 | 1   | 2 | 0 | 2 | 2 | 4  |      |
| 41 | 2,4-D                                      | 94-75-7    | 78 | 45  | 3 | 2 | 3 | 3 | 4  | 1    |
| 42 | 2,5-D                                      | 582-54-7   | 44 | 1.6 | 2 | 0 | 2 | 2 | 3  | 1    |
| 43 | 2,6-D                                      | 575-90-6   | 13 | 0   | 1 | 0 | 1 | 0 | 7  |      |
| 44 | 2,4,5-trichlorophenoxyacetic acid          | 93-76-5    | 42 | 4   | 2 | 0 | 3 | 3 | 7  | 1    |
| 45 | 2,4,6-trichlorophenoxyacetic acid          | 575-89-3   | 4  | 1   | 0 | 0 | 0 | 0 | 3  | 3, 4 |
| 46 | picloram                                   | 1918-02-1  | 45 | 103 | 2 | 3 |   |   |    |      |
| 47 | Fluoxypyr                                  | 2840-00-8  | 80 | 143 | 3 | 3 |   |   |    |      |
| 48 | trichlopyr                                 | 55335-06-3 | 60 | 90  | 3 | 3 |   |   |    |      |
| 49 | DAS534*                                    |            | 79 | 191 | 3 | 3 |   |   |    |      |
| 50 | DAS805*                                    |            | 0  | 5   | 0 | 0 |   |   |    |      |
| 51 | clopyralid                                 | 1702-17-6  | 0  | 0   | 0 | 0 |   |   |    |      |
| 52 | nicotinic acid                             | 59-67-6    | 0  | 0   | 0 | 0 |   |   |    |      |
| 55 | quinclorac                                 | 84087-01-4 | 0  | 81  | 0 | 3 |   |   |    |      |
| 56 | 1-naphthylacetic-L-aspartic acid           |            | 0  | 1   | 0 | 0 |   |   |    |      |
| 57 | indole-3-acetic-L-aspartic acid            |            | 0  | 0   | 0 | 0 |   |   |    |      |
| 58 | benzoyl aspartic acid                      |            | 0  |     | 0 |   |   |   |    |      |
| 59 | o-benzoyl-L-malic acid                     | 22138-51-8 | 1  |     | 0 |   |   |   |    |      |
| 60 | indole-3-acetic acid ethyl ester           | 778-82-5   | 15 | 18  | 1 | 1 |   |   |    |      |

|           |                                                                |                   |          |          |          |          |  |  |  |  |
|-----------|----------------------------------------------------------------|-------------------|----------|----------|----------|----------|--|--|--|--|
|           |                                                                |                   |          |          |          |          |  |  |  |  |
| 61        | <b>quinic acid (tetra-hydroxy-cyclohexane carboxylic acid)</b> | <b>77-95-2</b>    | <b>0</b> | <b>0</b> | <b>0</b> | <b>0</b> |  |  |  |  |
| 62        | <b>L-phenylalanine</b>                                         | <b>63-91-2</b>    | <b>0</b> | <b>0</b> | <b>0</b> | <b>0</b> |  |  |  |  |
| <b>63</b> | <b>abscisic acid</b>                                           | <b>14375-45-2</b> | <b>0</b> | <b>1</b> | <b>0</b> | <b>0</b> |  |  |  |  |

Table S2

Table of auxins and related compounds tested and represented in Figure 5, but sorted (column 1, N) according to binding activity as shown for Figure 6. CAS is the Chemical Registry number for each compound. The columns labelled TIR1 and AFB5 give the amplitude of the association at report point 1 as a percentage of the response for IAA (100%). The following columns are:  $Ave_{(TIR1-AB5)}$ , the average of TIR1 and AFB5 binding activities as well as Factors 1 and 2 (Figure 6a); (Effic.), binding Efficiency level (Figure 6); (Spec.) the predicted specificity from the quantum chemical structures; (Class), classification based on electronic structure differences (unspec = class not specified).

| N  | Compound                     | Labels | CAS        | TIR1 | AFB5 | $Ave_{(TIR1-AB5)}$ | Effic. | Spec. | Class  |
|----|------------------------------|--------|------------|------|------|--------------------|--------|-------|--------|
| 1  | Tryptophan                   | l      | 73-22-3    | 0    | 0    | 0                  | 1      | 2     | Unspec |
| 2  | Indole-3-lactic ac.          | l      | 832-97-3   | 0    | 0    | 0                  | 1      | 2     | Unspec |
| 3  | Indole-3-glycolic ac.        | n      | 3050-37-1  | 0    | 0    | 0                  | 1      | 2     | Unspec |
| 4  | Indole-3-carbinol            | p      | 700-06-1   | 0    | 0    | 0                  | 1      | 2     | Unspec |
| 5  | Indoxylacetic ac.            | q      |            | 0    | 0    | 0                  | 1      | 2     | Unspec |
| 6  | Indole-3-carboxylic ac.      | r      | 771-50-6   | 0    | 0    | 0                  | 1      | 2     | Unspec |
| 7  | Indole-3-acetaldehyde        | s      | 2591-98-2  | 0    | 0    | 0                  | 1      | 2     | Unspec |
| 8  | Benazolin                    | t      | 3813-05-6  | 0    | 0    | 0                  | 1      | 2     | Unspec |
| 9  | Amiben                       | A      | 133-90-4   | 0    | 0    | 0                  | 1      | 2     | Unspec |
| 10 | 3,5-diI-2-OH-benzoic ac.     | C      | 133-91-5   | 0    | 0    | 0                  | 1      | 2     | Unspec |
| 11 | Clopyralid                   | V      | 1702-17-6  | 0    | 0    | 0                  | 1      | 2     | Unspec |
| 12 | Nicotinic ac.                | W      | 59-67-6    | 0    | 0    | 0                  | 1      | 2     | Unspec |
| 13 | IAA-L-aspartic ac.           | Z      |            | 0    | 0    | 0                  | 1      | 2     | Unspec |
| 14 | Benzoyl aspartic ac.         | 2      |            | 0    | 0    | 0                  | 1      | 2     | Unspec |
| 15 | Quinic acid                  | 5      | 77-95-2    | 0    | 0    | 0                  | 1      | 2     | Unspec |
| 16 | L-phenylalanine              | 6      | 63-91-2    | 0    | 0    | 0                  | 1      | 2     | Unspec |
| 17 | 2,5-dihydroxybenzoic ac.     | y      | 490-79-9   | 1    | 0    | 0,5                | 2      | 2     | Unspec |
| 18 | NAA aspartate                | Y      |            | 0    | 1    | 0,5                | 2      | 2     | Unspec |
| 19 | o-benzoyl-L-malic ac.        | 3      | 22138-51-8 | 1    | 0    | 0,5                | 2      | 2     | Unspec |
| 20 | ABA                          | 7      | 14375-45-2 | 0    | 1    | 0,5                | 2      | 2     | Unspec |
| 21 | p-hydroxycinnamic ac.        | h      | 4120-62-1  | 0    | 2    | 1                  | 2      | 2     | Unspec |
| 22 | 2,5-diCl-benzoic ac.         | x      | 50-79-3    | 2    | 0    | 1                  | 2      | 2     | Unspec |
| 23 | Gallic acid                  | E      | 149-91-7   | 2    | 0    | 1                  | 2      | 2     | Unspec |
| 24 | 2,3,5-I-benzoic ac.          | F      | 88-82-4    | 0    | 2    | 1                  | 2      | 2     | Unspec |
| 25 | 4-OH-benzoic ac.             | v      | 99-96-7    | 3    | 0    | 1,5                | 2      | 2     | Unspec |
| 26 | 2-NH2-3,5-di-I-benzoic ac.   | B      | 609-86-9   | 3    | 0    | 1,5                | 2      | 2     | Unspec |
| 27 | 2,4,6-T                      | Q      | 575-89-3   | 4    | 1    | 2,5                | 2      | 2     | Unspec |
| 28 | 2,4-diCl-benzoic ac.         | w      | 50-84-0    | 6    | 0    | 3                  | 3      | 2     | Unspec |
| 29 | 2-Cl-5-Br-methoxybenzoic ac. | z      |            | 7    | 0    | 3,5                | 3      | 2     | Unspec |
| 30 | Benzoic ac.                  | u      | 65-85-0    | 8    | 0    | 4                  | 3      | 2     | Unspec |
| 31 | Tryptophol                   | j      | 526-55-6   | 7    | 2    | 4,5                | 3      | 2     | Unspec |
| 32 | 2-naphthoxyacetic ac.        | d      | 120-23-0   | 0    | 12   | 6                  | 3      | 3     | AFB5   |
| 33 | 2-formylphenoxyacetic ac.    | K      | 6280-80-4  | 6    | 6    | 6                  | 3      | 2     | Unspec |
| 34 | Tryptamine                   | k      | 61-54-1    | 7    | 6    | 6,5                | 3      | 2     | Unspec |
| 35 | 4-Cl-phenylacetic ac.        | l      | 1878-66-6  | 5    | 8    | 6,5                | 3      | 2     | Unspec |
| 36 | 2,6-D                        | O      | 575-90-6   | 13   | 0    | 6,5                | 3      | 2     | Unspec |
| 37 | Phenoxy acetic ac.           | J      | 122-59-8   | 15   | 2    | 8,5                | 3      | 2     | Unspec |
| 38 | IBA                          | e      | 133-32-4   | 15   | 5    | 10                 | 3      | 2     | Unspec |
| 39 | 2-NAA                        | c      | 581-96-4   | 25   | 0    | 12,5               | 3      | 1     | TIR1   |
| 40 | 2,3,6-Cl-benzoic ac.         | D      | 50-31-7    | 17   | 9    | 13                 | 3      | 2     | Unspec |
| 41 | IAA-ethyl ester              | 4      | 778-82-5   | 15   | 18   | 16,5               | 4      | 2     | Unspec |
| 42 | 4-Cl-phenoxyacetic ac.       | L      | 122-88-3   | 35   | 1    | 18                 | 4      | 1     | TIR1   |
| 43 | 4-OH-phenylacetic ac.        | H      | 156-38-7   | 38   | 3    | 20,5               | 4      | 1     | TIR1   |
| 44 | 2,5-D                        | N      | 582-54-7   | 44   | 1,6  | 22,8               | 4      | 1     | TIR1   |
| 45 | 2,4,5-T                      | P      | 93-76-5    | 42   | 4    | 23                 | 4      | 1     | TIR1   |



|    |                        |   |            |     |     |       |   |   |        |
|----|------------------------|---|------------|-----|-----|-------|---|---|--------|
| 46 | Phenyl acetic ac.      | G | 103-82-2   | 55  | 5   | 30    | 5 | 1 | TIR1   |
| 47 | Indole-3-propionic ac. | m | 830-96-6   | 54  | 27  | 40,5  | 5 | 1 | TIR1   |
| 48 | Indole-3-pyruvic ac.   | o | 392-12-1   | 54  | 27  | 40,5  | 5 | 1 | TIR1   |
| 49 | Quinclorac             | X | 84087-01-4 | 0   | 81  | 40,5  | 5 | 3 | AFB5   |
| 50 | Dichlorprop            | f | 120-36-5   | 56  | 30  | 43    | 5 | 1 | TIR1   |
| 51 | 2,4,5-TP               | g | 93-72-1    | 70  | 35  | 52,5  | 5 | 1 | TIR1   |
| 52 | 2,4-D                  | M | 94-75-7    | 78  | 45  | 61,5  | 5 | 1 | TIR1   |
| 53 | NAA                    | b | 86-87-3    | 76  | 59  | 67,5  | 5 | 1 | TIR1   |
| 54 | Picloram               | R | 1918-02-1  | 45  | 103 | 74    | 5 | 3 | AFB5   |
| 55 | Trichlopyr             | T | 55335-06-3 | 60  | 90  | 75    | 5 | 2 | Unspec |
| 56 | IAA                    | a | 87-51-4    | 100 | 100 | 100   | 5 | 1 | TIR1   |
| 57 | Fluoxypyr              | S | 69377-81-7 | 80  | 143 | 111,5 | 5 | 3 | AFB5   |
| 58 | DAS534                 | U |            | 79  | 191 | 135   | 5 | 3 | AFB5   |

Table S3: Coefficients of linear discriminants for binding efficiency and specificity.

|             | Efficiency |         |         |         | Specificity |          |
|-------------|------------|---------|---------|---------|-------------|----------|
|             | LD1        | LD2     | LD3     | LD4     | LD1         | LD2      |
| V1          | -0,0001    | -0,0003 | 0,0000  | 0,0000  | -0,0008     | 0,0000   |
| V2          | 0,0035     | 0,0002  | 0,0007  | -0,0004 | 0,0048      | 0,0010   |
| V3          | 0,0037     | -0,0009 | 0,0006  | -0,0001 | -0,0059     | 0,0019   |
| V4          | -0,0058    | 0,0018  | -0,0007 | 0,0003  | -0,0019     | -0,0017  |
| V5          | -0,0100    | -0,0017 | -0,0040 | 0,0001  | -0,0291     | -0,0038  |
| V6          | 0,0099     | -0,0001 | -0,0006 | -0,0006 | -0,0117     | 0,0119   |
| V7          | -0,0079    | 0,0010  | -0,0039 | 0,0004  | -0,0216     | 0,0035   |
| V8          | -0,0178    | 0,0048  | 0,0010  | 0,0000  | -0,0083     | -0,0094  |
| V9          | 0,0132     | -0,0020 | -0,0004 | -0,0019 | -0,0118     | 0,0185   |
| V10         | 0,0154     | 0,0149  | 0,0036  | -0,0007 | 0,0342      | 0,0017   |
| V11         | 0,0420     | -0,0118 | -0,0031 | 0,0032  | -0,0028     | 0,0298   |
| V12         | 0,0872     | 0,0387  | 0,0040  | 0,0025  | 0,0348      | 0,1199   |
| V13         | -0,0332    | -0,0332 | -0,0280 | 0,0032  | -0,0286     | 0,1021   |
| V14         | 0,0777     | 0,0201  | -0,0598 | -0,0018 | -0,0012     | -0,0530  |
| V15         | 0,0792     | 0,0806  | -0,0309 | -0,0046 | -0,1296     | 0,0359   |
| V16         | 0,0614     | -0,0841 | 0,0021  | 0,0080  | 0,0486      | -0,0783  |
| V17         | -0,1622    | 0,0526  | -0,0263 | -0,0122 | -0,1625     | -0,0970  |
| V18         | -0,0706    | 0,0502  | -0,0016 | -0,0246 | -0,0293     | -0,0606  |
| V19         | -0,0284    | 0,0852  | 0,0253  | 0,0273  | 0,2246      | 0,0618   |
| V20         | 0,2768     | 0,1488  | -0,0250 | -0,0011 | -0,1142     | 0,4034   |
| V21         | -0,1159    | -0,1178 | 0,0022  | 0,0126  | -0,2391     | -0,0362  |
| V22         | 0,5165     | 0,0701  | 0,0077  | 0,0319  | -0,0803     | 0,1692   |
| V23         | 0,2218     | 0,2642  | -0,0032 | 0,0020  | 0,4020      | 0,0064   |
| V24         | -0,4674    | -0,0027 | 0,2484  | 0,0227  | -0,3074     | -0,2332  |
| V25         | 0,1009     | -0,0021 | -0,0232 | 0,0675  | -0,8526     | 0,1701   |
| V26         | -0,6789    | -0,1309 | -0,1220 | -0,1778 | -0,2079     | -0,0363  |
| V27         | -0,6246    | 0,1944  | 0,0774  | 0,0198  | 0,0651      | 0,0987   |
| V28         | -0,1249    | 0,1548  | -0,0453 | 0,0192  | -1,1494     | 0,2555   |
| V29         | 0,0287     | -0,2051 | 0,0634  | 0,0245  | -1,2714     | 0,2283   |
| V30         | 0,1455     | -0,2532 | -0,2201 | 0,0173  | 0,0523      | 0,0541   |
| V31         | 0,0669     | -0,2370 | 0,3371  | -0,0868 | 0,2894      | -0,1502  |
| V32         | 0,1947     | 0,3327  | -0,1696 | -0,0453 | -1,2572     | -0,0819  |
| V33         | 0,0533     | -0,6659 | 0,0558  | -0,1047 | 0,3387      | -0,9031  |
| V34         | 1,2424     | -0,3514 | 0,3572  | 0,0546  | 5,0707      | 0,3418   |
| V35         | 0,7379     | 0,7599  | 0,1739  | 0,1084  | 1,0469      | -0,0376  |
| V36         | -1,6349    | 0,9755  | -0,0409 | -0,0389 | 0,0281      | -1,0148  |
| V37         | -1,2160    | -0,4155 | 0,1674  | -0,0588 | -3,7130     | -0,0563  |
| V38         | 0,1683     | -1,3711 | 0,9712  | 0,0624  | 1,2376      | -0,8936  |
| V39         | -0,0534    | -0,8389 | -1,4114 | 0,0142  | -2,4853     | -1,2819  |
| V40         | 0,5278     | 2,6549  | -0,7737 | -0,0461 | 0,7391      | -0,6191  |
| V41         | -2,3350    | -3,3178 | 0,5732  | 0,1695  | -1,0719     | -2,5540  |
| V42         | -1,9693    | 0,4135  | -0,0991 | -0,4127 | 0,4658      | -1,8107  |
| V43         | 1,8941     | 0,5215  | -0,4729 | 0,1246  | -0,3029     | -1,6816  |
| V44         | 0,7419     | -0,2081 | 0,1938  | -0,0962 | -0,1692     | -1,0608  |
| V45         | -6,2229    | 2,1608  | -0,0917 | 0,1961  | -1,0633     | -1,3860  |
| V46         | 1,7544     | 0,2472  | -2,2746 | -0,5282 | -6,4901     | -1,7251  |
| V47         | -6,9869    | -1,5953 | -1,2653 | 0,7409  | 1,0124      | -8,4634  |
| V48         | 1,0149     | 1,2677  | -0,1394 | 0,5484  | 4,9508      | -1,9105  |
| V49         | -5,8126    | 1,2335  | 6,9949  | 0,2773  | 5,3395      | -1,1611  |
| V50         | -18,7608   | 5,6521  | -0,6418 | -0,1812 | -4,2312     | -7,5737  |
| V51         | 17,7378    | 1,6562  | -6,6741 | 0,5226  | 4,0870      | 7,1268   |
| V52         | 7,0208     | -9,1066 | -2,2938 | 0,3224  | -6,0149     | -10,3939 |
| V53         | -4,5536    | 9,4754  | 3,7428  | 0,2410  | 2,2736      | 8,1695   |
| V54         | -7,5793    | -1,4238 | -5,7529 | 1,1402  | 3,8513      | -1,3792  |
| Prop. Trace | 0,76       | 0,17    | 0,07    | 0       | 0,79        | 0,21     |
